# Supplementary material
Source: PubMed Central journal article supplement (PMC7662477)
Supplement: jamaoncol-e205865-s003.pdf [file jamaoncol-e205865-s003.pdf]

# Data Sharing Statement

Lansu. Dose Reduction of Preoperative Radiotherapy in Myxoid Liposarcoma. *JAMA Oncol*. Published November 12, 2020.  
doi:10.1001/jamaoncol.2020.5865

## Data

**Data available:** Yes

**Data types:** Other (please specify)

**Additional Information:** Whatever is needed for the request, of course, without violating local and national laws.

**How to access data:** Data requests can be send to the corresponding author([r.haas@nki.nl](mailto:r.haas@nki.nl)) or submitting author ([j.lansu@nki.nl](mailto:j.lansu@nki.nl))

**When available:** With publication

## Supporting Documents

**Document types:** None

## Additional Information

**Who can access the data:** researchers whose proposed use of the data has been approved

**Types of analyses:** meta-analysis, systematic review

**Mechanisms of data availability:** after approval of a proposal and with a signed data access agreement

**Any additional restrictions:** the request should be scientifically valid
